# Supplementary material
Source: MDPI journal article supplement (https://www.mdpi.com/2073-4344/13/9/1259)
Supplement: s1 [file s1]

# Carbon nanomaterials from polyolefin waste: effective catalysts for quinoline degradation through catalytic wet peroxide oxidation

Fernanda F. Roman<sup>1,2,3,4\*</sup>, Larissa de G. Piccinin<sup>1,2,5</sup>, Adriano S. Silva<sup>1,2,3,4</sup>, Jose L. Diaz de Tuesta<sup>6</sup>, Isabella V. de Freitas<sup>1,2,7</sup>, Admilson Vieira<sup>5</sup>, Giane G. Lenzi<sup>7</sup>, Adrián M. T. Silva<sup>3,4</sup>, Joaquim L. Faria<sup>3,4</sup> and Helder T. Gomes<sup>1,2\*</sup>

<sup>1</sup>Centro de Investigação de Montanha (CIMO), Instituto Politécnico de Bragança, Campus de Santa Apolónia, 5300-253 Bragança, Portugal

<sup>2</sup>Laboratório Associado para a Sustentabilidade e Tecnologia em Regiões de Montanha (SusTEC), Instituto Politécnico de Bragança, Portugal

<sup>3</sup>Laboratory of Separation and Reaction Engineering – Laboratory of Catalysis and Materials (LSRE-LCM), Faculdade de Engenharia, Universidade do Porto, Rua Dr. Roberto Frias, 4200-465 Porto, Portugal

<sup>4</sup>ALiCE— Associate Laboratory in Chemical Engineering, Faculdade de Engenharia, Universidade do Porto, 4200-465 Porto, Portugal

<sup>5</sup>Universidade Tecnológica Federal do Paraná, Campus Londrina, 86036-370 Londrina, Brasil

<sup>6</sup>Department of Chemical and Environmental Technology, ESCET, Rey Juan Carlos University, Tulipán s/n, 28933 Móstoles, Spain

<sup>7</sup>Universidade Tecnológica Federal do Paraná, Campus Ponta Grossa, 84017-220 Ponta Grossa, Brasil

\* Corresponding author:

Tel.: +351 273 303 098; Fax: +351 273 313 051;

E-mail addresses: htgomes@ipb.pt; roman@ipb.pt

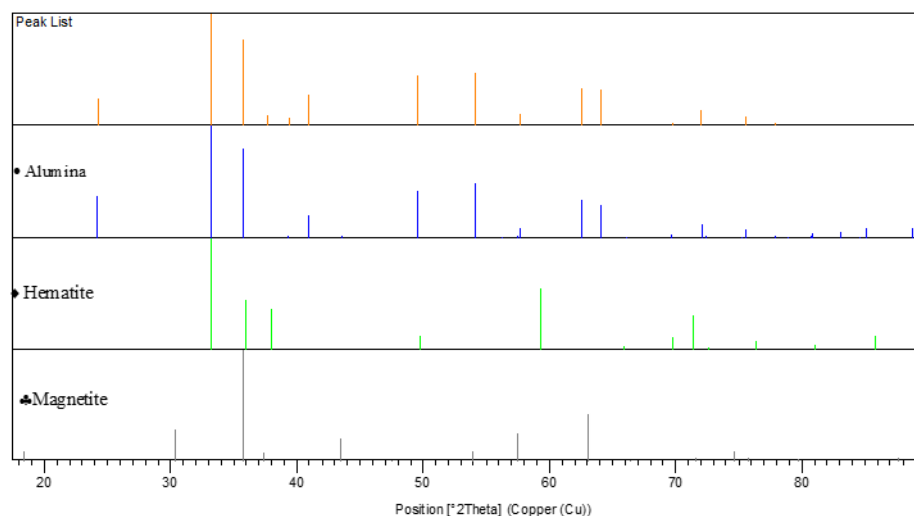

**Figure S1.** COD reference cards of alumina, hematite, and magnetite.

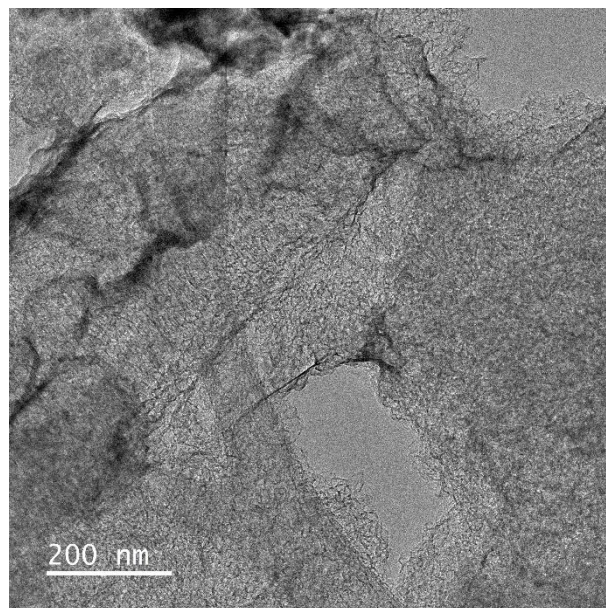

**Figure S2.** TEM image of CNM-LDPE-600 showing its amorphous nature.

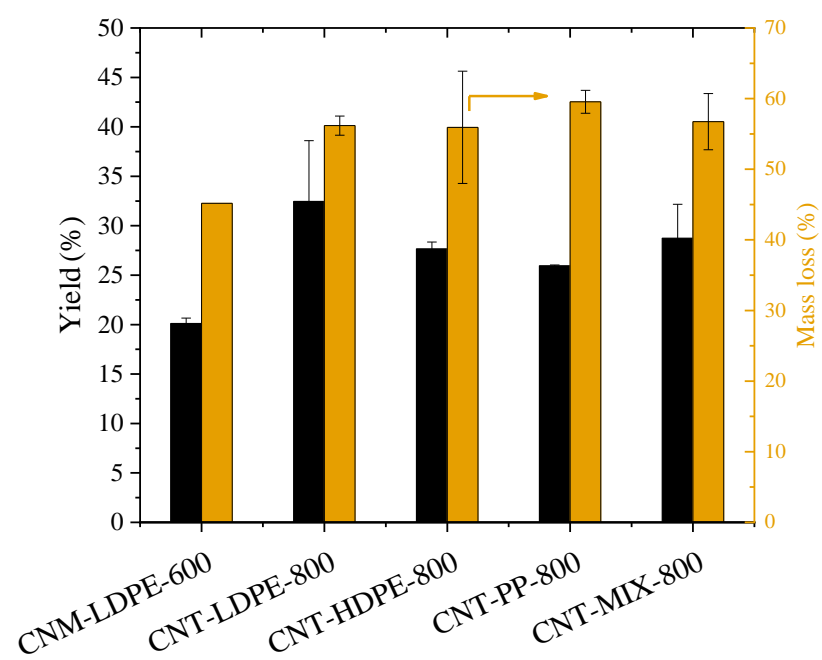

**Figure S3.** Yield of the materials after CVD and mass loss after purification.

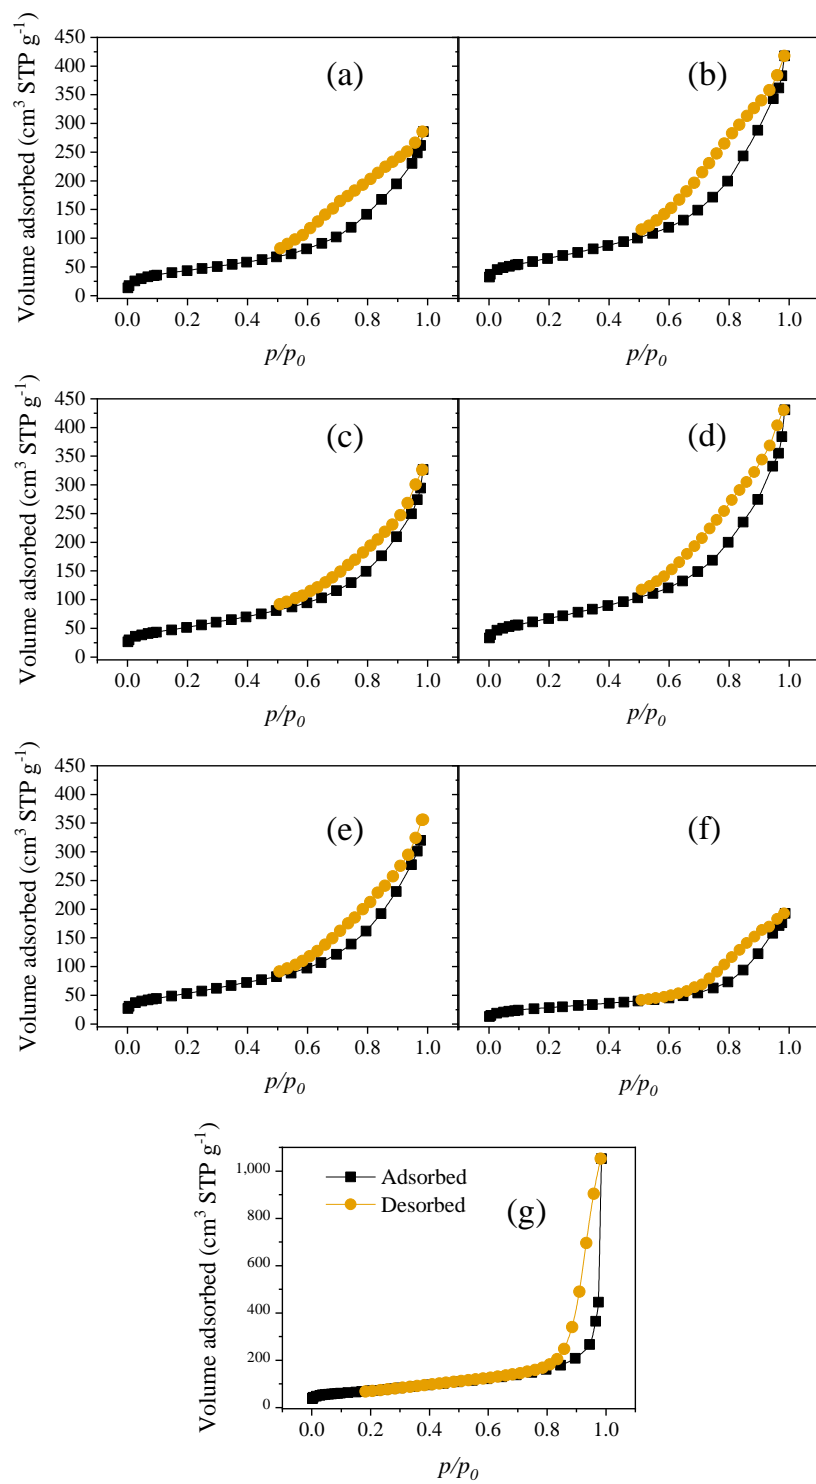

**Figure S4.** Textural properties of (a) CNM-LDPE-600, (b) CNT-LDPE-800, (c) CNT-HDPE-800, (d) CNT-PP-800, (e) CNT-MIX-800, (f) Fe<sub>2</sub>O<sub>3</sub>/Al<sub>2</sub>O<sub>3</sub>, (g) CNT-C.

(a)

(b)

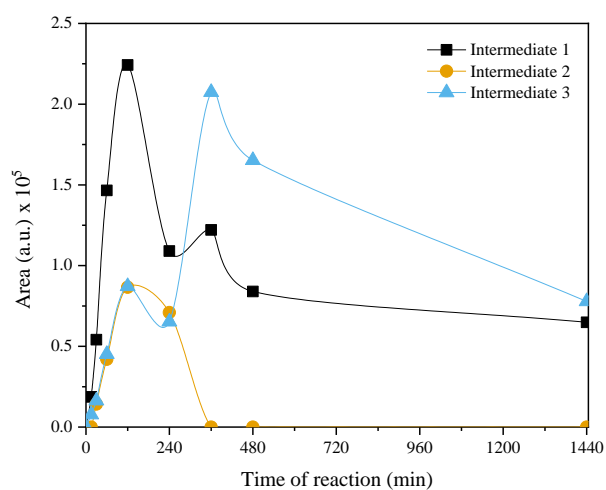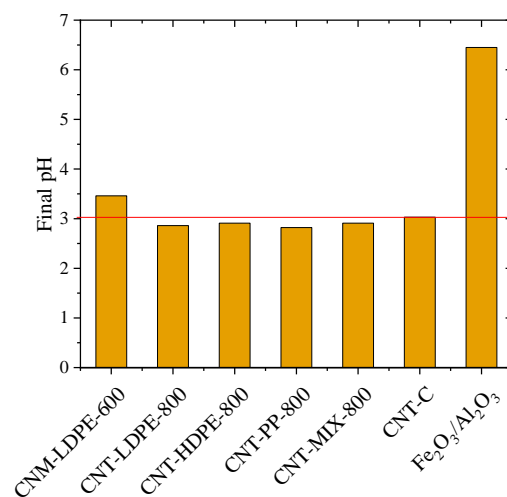

(c)

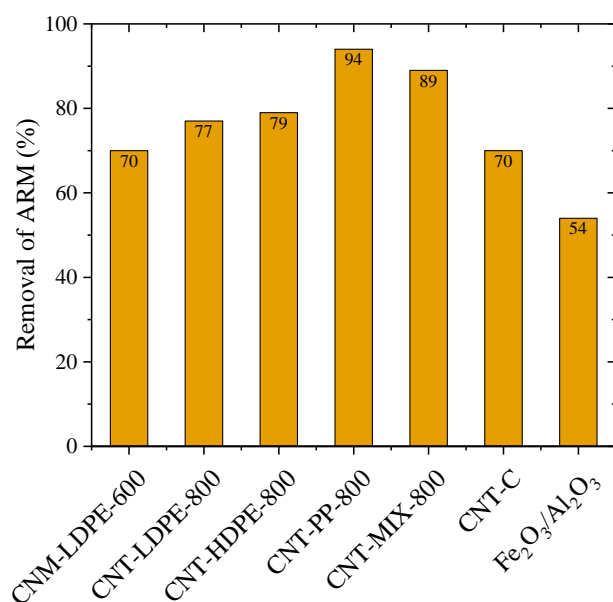

**Figure S5.** (a) Formation and degradation of intermediate compounds detected by HPLC during the non-catalytic wet peroxide oxidation of QN; (b) pH after CWPO in the presence of the catalysts (Red line indicates initial pH); and (c) Abatement of ARM after CWPO in the presence of the catalysts. Conditions:  $\text{pH}_0 = 3.0$ ,  $[\text{QN}]_0 = 100 \text{ mg L}^{-1}$ ,  $[\text{H}_2\text{O}_2]_0 = 6.2 \text{ g L}^{-1}$ ,  $C_{\text{cat}} = 2.5 \text{ g L}^{-1}$  (where applicable),  $T = 80^\circ \text{C}$ .
